# Supplementary material
Source: PubMed Central journal article supplement (PMC3624937)
Supplement: supp_blood-2012-07-445783_blood-2012-07-445783-1.pdf [file supp_blood-2012-07-445783_blood-2012-07-445783-1.pdf]

# Supplementary Figure 1

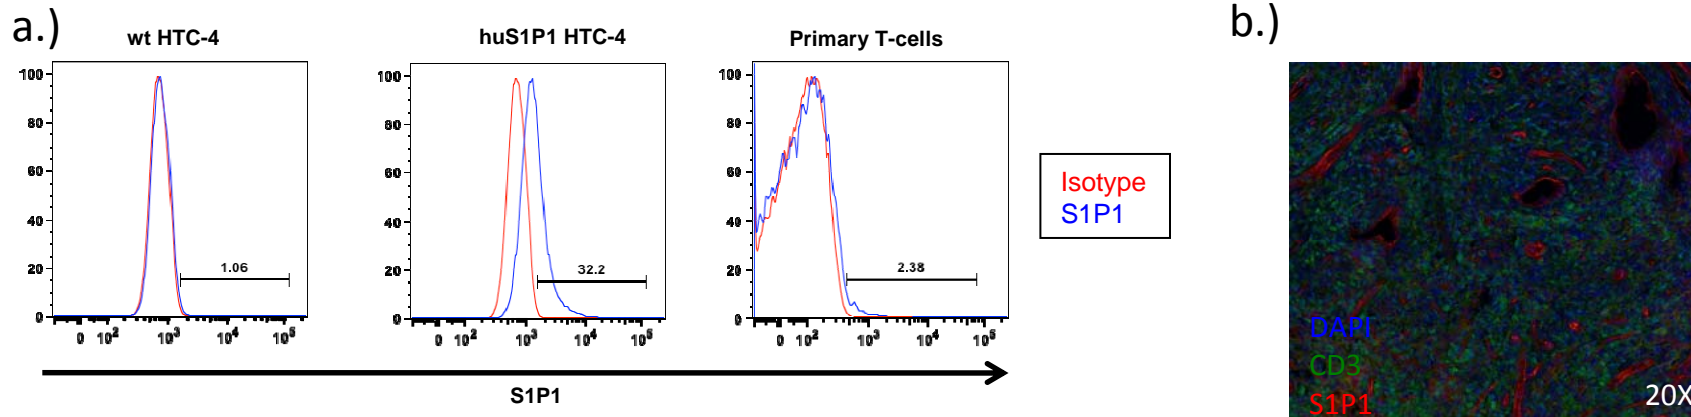

**Supplementary Fig 1. Failure to detect S1P1 protein in human T-cells.** Staining with a.) an N-terminal S1P1 ab from R&D systems on S1P1-null and huS1P1-transfected rat hepatoma HTC-4 cell lines and primary human T-cells. b.) a C-terminal S1P1 antibody from Santa Cruz Biotechnology applied to fixed human LN tissue sections recognizes S1P1 on endothelial cells but not on lymphocytes.
